# Supplementary material
Source: Springer Nature journal article supplement (https://www.springermedizin.de/resource/supplementary/12933_2009_201_MOESM4_ESM.pdf/9539820)

DM1 versus CTR

DM1 + FA versus CTR

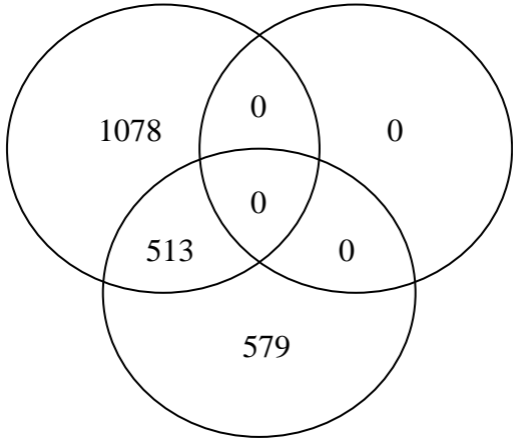

DM1 versus DM1 + FA

Supplement: MOESM4 [file 9539820]
